# Supplementary material for: Immuno-persistence after the 4th and 5th dose of inactivated polio vaccines in school-aged children
Source: Research Square preprint supplement (doi:10.21203/rs.3.rs-3890516/v1), 2024-01-30
Supplement: Supplementary file 1 [file 14e79feed8d47474ef86f9d2.pdf]

## Supplementary Information

**Table S1. Vaccination schedule by countries or regions in the Western Pacific Region**

| Country/region                                                  | Number of doses | Vaccination time                                                | IPV vaccines used    |
|-----------------------------------------------------------------|-----------------|-----------------------------------------------------------------|----------------------|
| Cambodia [1]                                                    | 1 IPV + 3 bOPV  | bOPV: 6 weeks, 10 weeks, 14 weeks<br>IPV: 14 weeks              | Unknown              |
| Hong Kong [2, 3]                                                | 6 IPV           | 2 months, 4 months, 6 months, 18 months, 6-7 years, 11-12 years | wIPVs                |
| Japan [4, 5]                                                    | 4 IPV           | 3 between 2-12 months; 1 between 12-18 months                   | Both wIPVs and sIPVs |
| Laos [6, 7]                                                     | 1 IPV + 3 bOPV  | bOPV: 6 weeks, 10 weeks, 14 weeks<br>IPV: 14 weeks              | wIPVs                |
| Macau [8, 9]                                                    | 5 IPV           | 2 months, 4 months, 6 months, 18 months, 5-6 years              | wIPVs                |
| Mainland China (except Shanghai, Jiangsu and Zhejiang) [10, 11] | 2 IPV + 2 bOPV  | IPV: 2 months, 3 months<br>bOPV: 4 months, 4 years              | sIPVs                |
| Mainland China (Shanghai, Jiangsu, Zhejiang) [11-14]            | 4 IPV           | 2 months, 3 months, 4 months, 18 months                         | sIPVs                |
| Malaysia [15]                                                   | 4 IPV           | 2 months, 3 months, 5 months, 18 months                         | wIPVs                |
| Mongolia [16, 17]                                               | 1 IPV + 4 bOPV  | bOPV: birth, 2 months, 3 months, 4 months<br>IPV: 5 months      | wIPVs                |
| The Philippines [18, 19]                                        | 2 IPV + 3 bOPV  | bOPV: 6 weeks, 10 weeks, 14 weeks<br>IPV: 14 weeks, 9 months    | wIPVs                |
| South Korea [20, 21]                                            | 4 IPV           | 2 months, 4 months, 6-18 months, 4-6 years                      | wIPVs                |
| Taiwan [22, 23]                                                 | 5 IPV           | 2 months, 4 months, 6 months, 18 months, 5 years                | wIPVs                |
| Vietnam [24, 25]                                                | 2 IPV + 3 bOPV  | bOPV: 2 months, 3 months, 4 months<br>IPV: 5 months, 9 months   | wIPVs                |

**Table S2. Participating children by the time after receiving the 4<sup>th</sup> or 5<sup>th</sup> dose of IPV**

| <b>Classification</b>                     | <b>Number of Participants (%)</b> |
|-------------------------------------------|-----------------------------------|
| 1-3 months after the 4 <sup>th</sup> dose | 8 (2.7%)                          |
| 6 months after the 4 <sup>th</sup> dose   | 12 (4.0%)                         |
| 12 months after the 4 <sup>th</sup> dose  | 20 (6.7%)                         |
| 24 months after the 4 <sup>th</sup> dose  | 31 (10.3%)                        |
| 36 months after the 4 <sup>th</sup> dose  | 39 (13.0%)                        |
| 48 months after the 4 <sup>th</sup> dose  | 46 (15.3%)                        |
| 1-3 months after the 5 <sup>th</sup> dose | 22 (7.3%)                         |
| 6 months after the 5 <sup>th</sup> dose   | 21 (7.0%)                         |
| 12 months after the 5 <sup>th</sup> dose  | 35 (11.7%)                        |
| 24 months after the 5 <sup>th</sup> dose  | 27 (9.0%)                         |
| 36 months after the 5 <sup>th</sup> dose  | 38 (12.7%)                        |

**Table S3. Estimated mean nAb titres one month after receiving the 4<sup>th</sup> and 5<sup>th</sup> dose of IPV**

| <b>IPV dose</b> | <b>PV type</b> | <b>Male</b>           | <b>Female</b>         |
|-----------------|----------------|-----------------------|-----------------------|
| 4               | PV1            | 2,317 (1,390 – 3,862) | 1,772 (1,098 – 2,918) |
| 4               | PV2            | 4,762 (3,146 – 7,490) | 4,553 (2,972 – 7,132) |
| 4               | PV3            | 2,813 (1,653 – 4,914) | 2,797 (1,604 – 4,970) |
| 5               | PV1            | 1,023 (739 – 1,424)   | 1,270 (941 – 1,721)   |
| 5               | PV2            | 2,684 (1,965 – 3,720) | 2,870 (2,197 – 3,761) |
| 5               | PV3            | 1,689 (1,086 – 2,617) | 2,160 (1,449 – 3,257) |

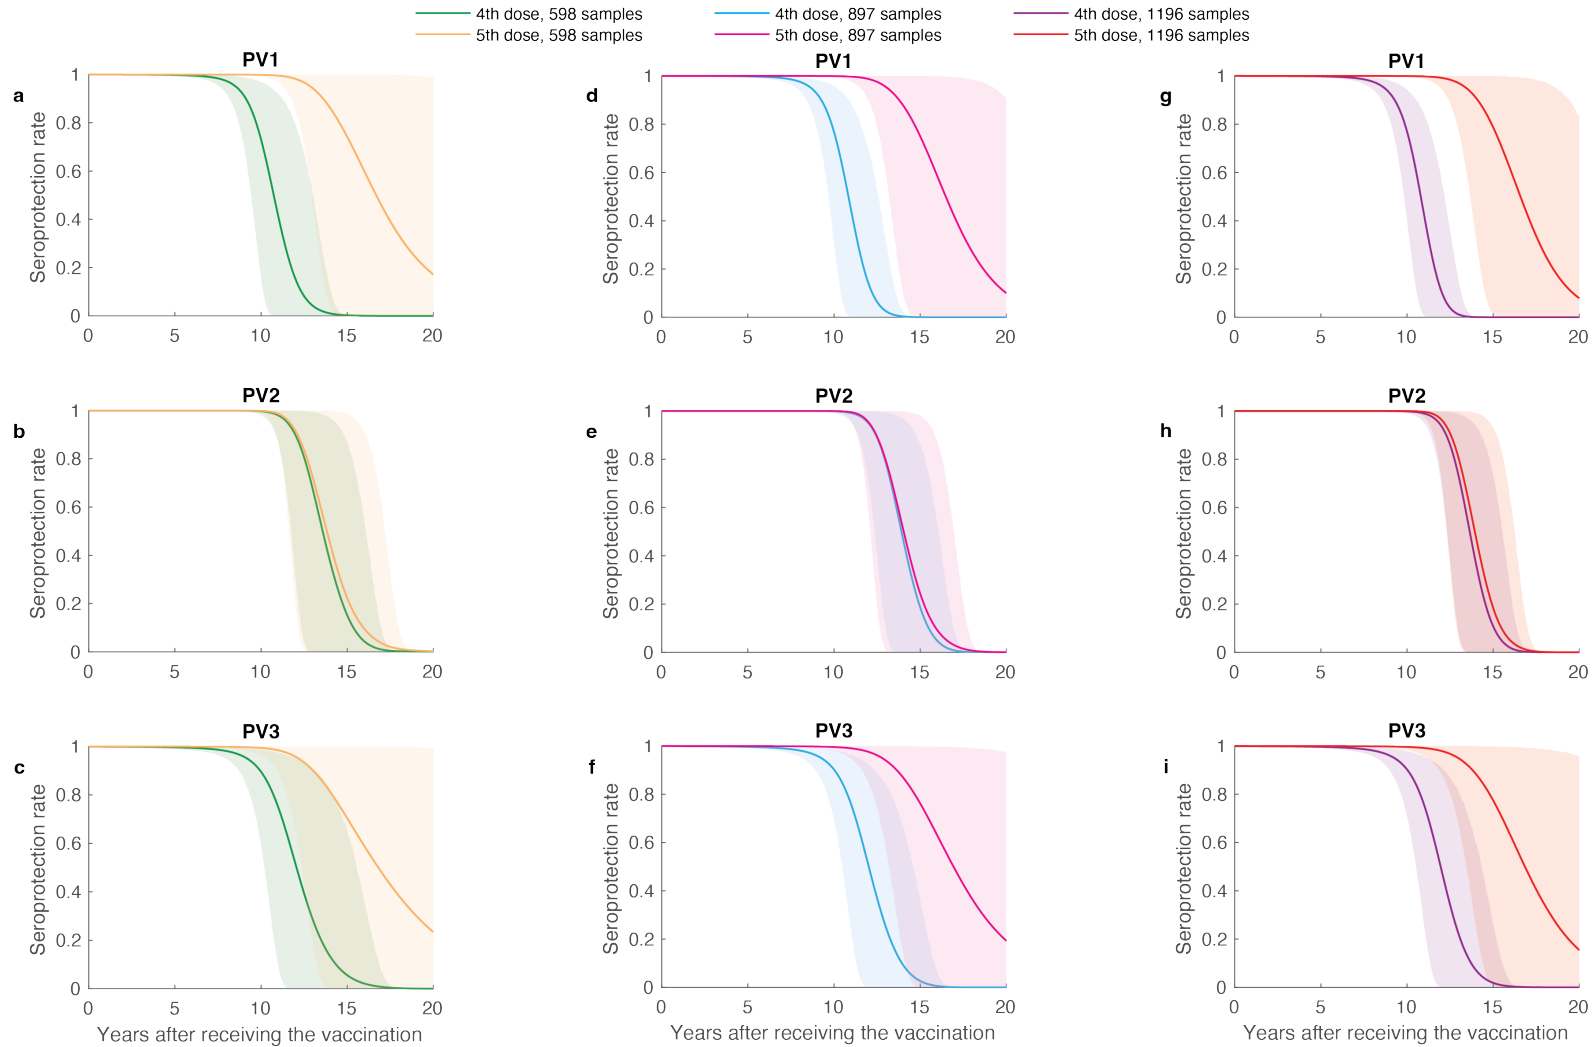

**Figure S1. Comparison of estimated seroprotection rates after receiving the 4<sup>th</sup> and 5<sup>th</sup> dose of IPV with increased sample sizes.** The seroprotection rates against PV1, PV2 and PV3 as a function of time since receiving the 4<sup>th</sup> or 5<sup>th</sup> dose of vaccination assuming there were (a-c) 598 samples; (d-f) 897 samples; and (g-i) 1196 samples. Solid lines and shades represent the posterior mean and 95% CrI of the estimates from data from increased sample size by replicating the original samples by (a-c) twice, (d-f) three times and (g-i) four times.

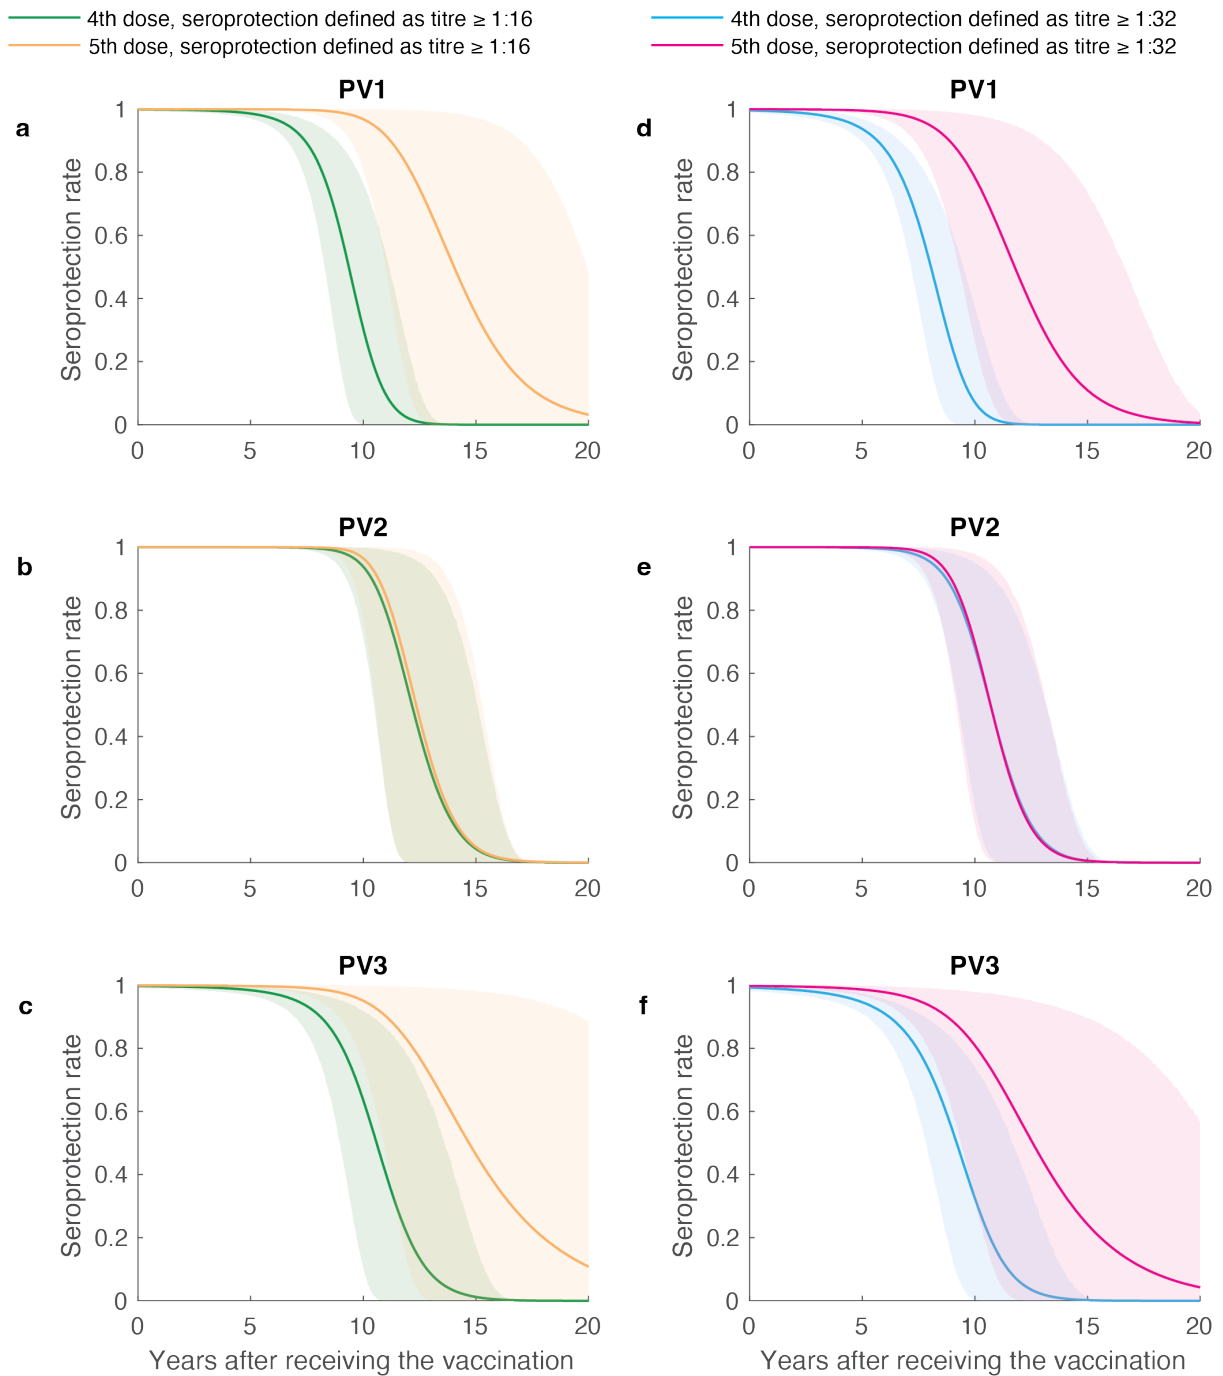

**Figure S2. Comparison of estimated seroprotection rates after receiving the 4<sup>th</sup> and 5<sup>th</sup> dose of IPV with different thresholds.** The seroprotection rates against PV1, PV2 and PV3 as a function of time after receiving the 4<sup>th</sup> or 5<sup>th</sup> dose of vaccination under the nAb titre threshold (a-c)  $\geq 16$ ; (d-f)  $\geq 32$ . Solid lines and shades represent the posterior mean and 95% CrI of the estimates under various pre-set threshold.

## References

1. World Health Organization. *Vaccination schedule for Cambodia*. Available from: [https://immunizationdata.who.int/pages/schedule-by-country/khm.html?DISEASECODE=&TARGETPOP\\_GENERAL=](https://immunizationdata.who.int/pages/schedule-by-country/khm.html?DISEASECODE=&TARGETPOP_GENERAL=).
2. Family Health Service. *Schedule of Hong Kong Childhood Immunisation Programme*. 2022 Sep 16; Available from: [https://www.fhs.gov.hk/english/main\\_ser/child\\_health/child\\_health\\_recommend.html](https://www.fhs.gov.hk/english/main_ser/child_health/child_health_recommend.html).
3. Pharmacy and Poisons Board of Hong Kong. *Search Drug Database*. 05-01-2024; Available from: <https://www.drugoffice.gov.hk/eps/drug/productSearchOneFieldAction2>.
4. Ministry of Health, Labour and Welfare. *Basic knowledge of polio and polio vaccine* 29-01-2018; Available from: <https://www.mhlw.go.jp/bunya/kenkou/polio/qa.html>.
5. Satoh, H., et al., *Polio vaccination coverage and seroprevalence of poliovirus antibodies after the introduction of inactivated poliovirus vaccines for routine immunization in Japan*. *Vaccine*, 2019. **37**(14): p. 1964-1971.
6. Ichimura, Y., et al., *The determinants of immunization coverage among children aged between 12 and 35 months: a nationwide cross-sectional study in Lao People's Democratic Republic*. *BMC Public Health*, 2022. **22**(1): p. 2259.
7. Food & Drug Department, *List of Drug Registration 06-06-2018*. 2018.
8. Imprensa Oficial. *Order from the Chief Executive No. 457/2017*. 2017; Available from: [https://bo.io.gov.mo/bo/i/2017/49/despce\\_cn.asp#458](https://bo.io.gov.mo/bo/i/2017/49/despce_cn.asp#458).
9. Instituto para a Supervisão e Administração Farmacêutica. *Drug Information of Macao SAR 2024*; Available from: <https://www.isaf.gov.mo/服務資訊/資料查詢/澳門特區藥品/>.
10. Chinese Centre for Disease Control and Prevention. *Poliomyelitis*. Available from: <https://m.chinacdc.cn/jkzt/ymyz/kpyd/bdxcrb/jh/>.
11. Lv, H., et al., *A Comparison with Adverse Events Following Immunization Associated with Sabin-Strains and Salk-Strains Inactivated Polio Vaccines in Zhejiang Province, China*. *Vaccines (Basel)*, 2022. **10**(2).
12. Jiangsu Commission of Health. *Notice on adjusting the polio vaccination program starting from 1 Jan 2023*. 2022 2022-09-23; Available from: [https://wjw.jiangsu.gov.cn/art/2022/9/23/art\\_7312\\_10613527.html](https://wjw.jiangsu.gov.cn/art/2022/9/23/art_7312_10613527.html).
13. Shanghai Municipal Health Commission. *Shanghai will adjust the immunization schedule for polio vaccine and measles-containing vaccine*. 2020 2020-07-27; Available from: <https://wsjkw.sh.gov.cn/gzdt1/20200728/d6440867ce9947898e463ba654c8a07f.html>.
14. Zhejiang Provincial Center for Disease Control and Prevention. *Zhejiang Province is going to implement 4-dose inactivated vaccines for polio immunization programme*. 2023 2022-06-30; Available from: [https://www.cdc.zj.cn/ywpd/mygh/ywdt/202306/t20230630\\_16499.shtml](https://www.cdc.zj.cn/ywpd/mygh/ywdt/202306/t20230630_16499.shtml).
15. Aljunid, S.M., et al., *Economic impact of switching from partially combined vaccine "Pentaxim® and hepatitis B" to fully combined vaccine "Hexaxim®" in the Malaysian National Immunization Program*. *BMC Health Services Research*, 2022. **22**(1): p. 34.

16. ДУНДГОВЬ АЙМАГ ЗДТГ. *NEWS AND INFORMATION* Available from: <https://www.dundgovi.gov.mn/mn/index.php?pid=439&nid=14217>.
17. Department of Medical Device Control and Regulation. *List of vaccines registered in Mongolia*. 17-05-2021.
18. Pediatrics Infectious Disease Society of the Philippines. *Childhood Immunization Schedule 2023*. 03-2023; Available from: <https://www.pidsphil.org/home/wp-content/uploads/2023/03/CHILDHOOD-IMMUNIZATION-SCHEDULE-2023-Edited.pdf>.
19. Food And Drug Administration Philippines. *Human Drugs*. 05-01-2024; Available from: [https://verification.fda.gov.ph/drug\\_productslist.php?cmd=search&t=drug\\_products&psearch=polio&psearchtype=&btn-submit=](https://verification.fda.gov.ph/drug_productslist.php?cmd=search&t=drug_products&psearch=polio&psearchtype=&btn-submit=).
20. Korea Disease Control and Prevention Agency. *National Immunization Program for children*. Available from: <https://www.kdca.go.kr/contents.es?mid=a30333000000>.
21. Yang, K., et al., *Post-Marketing Safety Surveillance of a Childhood Pentavalent Diphtheria-Tetanus-Acellular Pertussis-Polio and Haemophilus influenzae Type B (DTaP-IPV//Hib) Vaccine in South Korea*. *Infect Dis Ther*, 2023. **12**(2): p. 499-511.
22. Taiwan Centers for Disease Control. *Current childhood vaccination schedule*. 2019.
23. Taiwan Centers for Disease Control. *Polio vaccine* 31-8-2023.
24. Thu Duc City Medical Center. *Vaccination Schedule for Children According to the Extended Vaccination Program*. 2-2-2023; Available from: <https://trungtamytethuduc.medinet.gov.vn/tiem-chung/lich-tiem-chung-cho-tre-theo-chuong-trinh-tiem-chung-mo-rong-cmobile15135-81992.aspx>.
25. Drug Administration Of VietNam. *1900/QLD-KD*. 21-02-2019; Available from: [https://dav.gov.vn/upload\\_images/files/1900\\_QLD\\_KD.pdf](https://dav.gov.vn/upload_images/files/1900_QLD_KD.pdf).
